# Supplementary material for: Consistency in boldness, activity and exploration at different stages of life
Source: PubMed Central journal article supplement (PMC3878951; doi:10.1186/1472-6785-13-49), 2013-12-07
Supplement: 1472-6785-13-49-S1.pdf [file 1472-6785-13-49-S1.pdf]

## Additional file

Additional file: Spearman correlation matrix of first testing round for all measured variables in the 'short term adult'-group

|                   |                     | Barrier            |                    |                 | Open-field          |                   |                 | Dark-light         |                 | Hole             |                    |                 |
|-------------------|---------------------|--------------------|--------------------|-----------------|---------------------|-------------------|-----------------|--------------------|-----------------|------------------|--------------------|-----------------|
|                   |                     | Latency            | Crossing frequency | Activity        | Latency unsafe zone | Time in safe zone | Activity        | Latency into light | Time in light   | Latency one hole | Latency four holes |                 |
| <b>Barrier</b>    | Crossing frequency  | $r_s$              | <b>-0.268</b>      |                 |                     |                   |                 |                    |                 |                  |                    |                 |
|                   |                     | <b>p</b>           | <b>0.08</b>        |                 |                     |                   |                 |                    |                 |                  |                    |                 |
|                   |                     | <b>N</b>           | <b>168</b>         |                 |                     |                   |                 |                    |                 |                  |                    |                 |
|                   | Activity            | $r_s$              | -0.225             | <b>0.521</b>    |                     |                   |                 |                    |                 |                  |                    |                 |
|                   |                     | <b>p</b>           | 0.84               | <b>&lt;0.01</b> |                     |                   |                 |                    |                 |                  |                    |                 |
|                   |                     | <b>N</b>           | 151                | <b>151</b>      |                     |                   |                 |                    |                 |                  |                    |                 |
| <b>Open-Field</b> | Latency unsafe zone | $r_s$              | 0.230              | <b>-0.327</b>   | -0.228              |                   |                 |                    |                 |                  |                    |                 |
|                   |                     | <b>p</b>           | 0.48               | <b>&lt;0.01</b> | 0.84                |                   |                 |                    |                 |                  |                    |                 |
|                   |                     | <b>N</b>           | 164                | <b>164</b>      | 147                 |                   |                 |                    |                 |                  |                    |                 |
|                   | Safe zone           | $r_s$              | -0.037             | -0.196          | -0.215              | <b>0.572</b>      |                 |                    |                 |                  |                    |                 |
|                   |                     | <b>p</b>           | 1.0                | 1.0             | 1.0                 | <b>&lt;0.01</b>   |                 |                    |                 |                  |                    |                 |
|                   |                     | <b>N</b>           | 164                | 164             | 147                 | <b>164</b>        |                 |                    |                 |                  |                    |                 |
|                   | Activity            | $r_s$              | -0.200             | 0.222           | <b>0.351</b>        | -0.248            | <b>-0.309</b>   |                    |                 |                  |                    |                 |
|                   |                     | <b>p</b>           | 1.0                | 0.67            | <b>&lt;0.01</b>     | 0.23              | <b>0.01</b>     |                    |                 |                  |                    |                 |
|                   |                     | <b>N</b>           | 164                | 164             | <b>147</b>          | 164               | <b>164</b>      |                    |                 |                  |                    |                 |
|                   | <b>Dark-light</b>   | Latency into light | $r_s$              | 0.174           | <b>-0.328</b>       | -0.169            | <b>0.324</b>    | 0.169              | -0.209          |                  |                    |                 |
|                   |                     |                    | <b>p</b>           | 1.0             | <b>&lt;0.01</b>     | 1.0               | <b>&lt;0.01</b> | 1.0                | 1.0             |                  |                    |                 |
|                   |                     |                    | <b>N</b>           | 166             | <b>166</b>          | 149               | <b>164</b>      | 164                | 164             |                  |                    |                 |
| Time in light     |                     | $r_s$              | -0.136             | 0.200           | 0.188               | -0.200            | -0.092          | 0.192              | <b>-0.530</b>   |                  |                    |                 |
|                   |                     | <b>p</b>           | 1.0                | 1.0             | 1.0                 | 1.0               | 1.0             | 1.0                | <b>&lt;0.01</b> |                  |                    |                 |
|                   |                     | <b>N</b>           | 166                | 166             | 149                 | 164               | 164             | 164                | <b>166</b>      |                  |                    |                 |
| <b>Hole</b>       | Latency one hole    | $r_s$              | 0.128              | -0.236          | -0.106              | 0.057             | 0.040           | 0.040              | 0.188           | -0.261           |                    |                 |
|                   |                     | <b>p</b>           | 1.0                | 0.97            | 1.0                 | 1.0               | 1.0             | 1.0                | 1.0             | 0.40             |                    |                 |
|                   |                     | <b>N</b>           | 132                | 132             | 132                 | 131               | 131             | 131                | 132             | 132              |                    |                 |
|                   | Latency four holes  | $r_s$              | -0.014             | -0.080          | -0.198              | -0.036            | -0.012          | -0.002             | 0.003           | -0.063           | <b>0.399</b>       |                 |
|                   |                     | <b>p</b>           | 1.0                | 1.0             | 1.0                 | 1.0               | 1.0             | 1.0                | 1.0             | 1.0              | <b>&lt;0.01</b>    |                 |
|                   |                     | <b>N</b>           | 132                | 132             | 132                 | 131               | 131             | 131                | 132             | 132              | <b>132</b>         |                 |
|                   | Number nose         | $r_s$              | -0.089             | 0.145           | 0.075               | 0.055             | 0.045           | 0.077              | -0.035          | 0.045            | <b>-0.550</b>      | <b>-0.490</b>   |
|                   |                     | <b>p</b>           | 1.0                | 1.0             | 1.0                 | 1.0               | 1.0             | 1.0                | 1.0             | 1.0              | <b>&lt;0.01</b>    | <b>&lt;0.01</b> |
|                   |                     | <b>N</b>           | 132                | 132             | 132                 | 131               | 131             | 131                | 132             | 132              | <b>132</b>         | <b>132</b>      |

P-values adjusted for multiple testing with Holm correction. Significant correlations are in bold ( $p < 0.05$ ).
